# Supplementary material for: Patterning of various materials by the photochemical reaction of [(C5H5)Fe(C6H6)]+ complex with salicylate dyes
Source: Royal Society of Chemistry journal article supplement (doi:10.1039/d0nj04221h), 2020-01-01

Supporting information for the paper in the New Journal of Chemistry

Patterning of various materials  
by the photochemical reaction of  $[\text{CpFe}(\text{C}_6\text{H}_6)]^+$  complex with salicylate dyes

Andrei M. Shved, Petr A. Zhmurov, Evgenii I. Gutsul, Dmitry S. Perekalin\*

*Nesmeyanov Institute of Organoelement Compounds of Russian Academy of Sciences,  
Vavilova 28, Moscow, 119991, Russia. E-mail: dsp@ineos.ac.ru*

**UV-visible spectra of aqueous solution (pH = 7) of the complex 1 and the corresponding dye before and after irradiation.** 3.3  $\mu\text{M}$  concentration of each reagent in quartz cell with 0.207 mm optical path.

| Dye                  | Absorption (nm) / extinction ( $\text{M}^{-1} \text{cm}^{-1}$ ) | Dye                               | Absorption (nm) / extinction ( $\text{M}^{-1} \text{cm}^{-1}$ ) |
|----------------------|-----------------------------------------------------------------|-----------------------------------|-----------------------------------------------------------------|
| Aluminon             | 306 / 11100                                                     | Aluminon iron complex             | 554 / 7500                                                      |
| Alumocresone         | 308 / 16500                                                     | Alumocresone iron complex         | 525 / 5800                                                      |
| Chrome Azurol S      | 426 / 9700                                                      | Chrome Azurol S iron complex      | 572 / 14500                                                     |
| Eriochrome Cyanine R | 437 / 8800                                                      | Eriochrome Cyanine R iron complex | 559 / 11900                                                     |
| Calcein              | 485 / 12800                                                     | Calcein iron complex              | 495 / 10800                                                     |

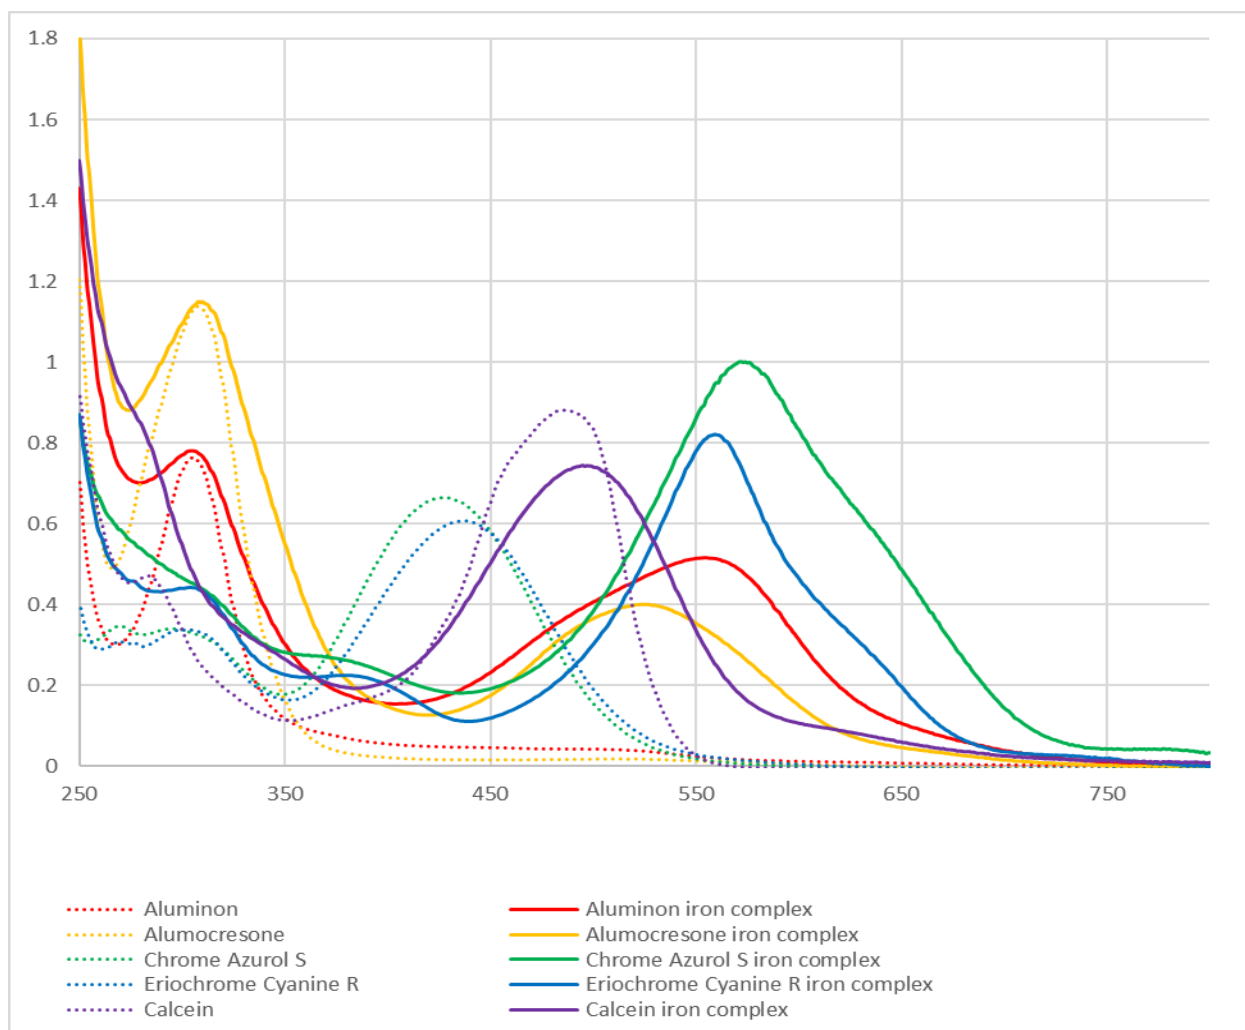

**Aqueous solutions of the complex 1 and the corresponding dye (3.3  $\mu\text{M}$  each) before irradiation (top) and after 5 h of irradiation (bottom).** From left to right: Aluminon, Alumocresone, Chrome Azurol S, Eriochrome Cyanine R, Calcein, Alizarin Complexone.

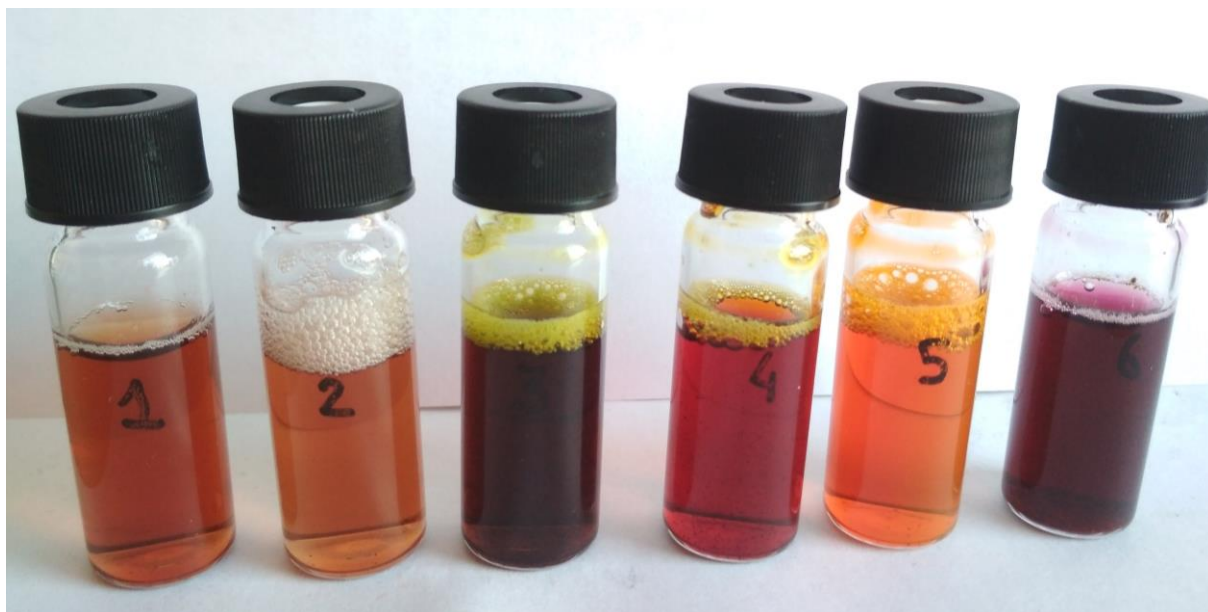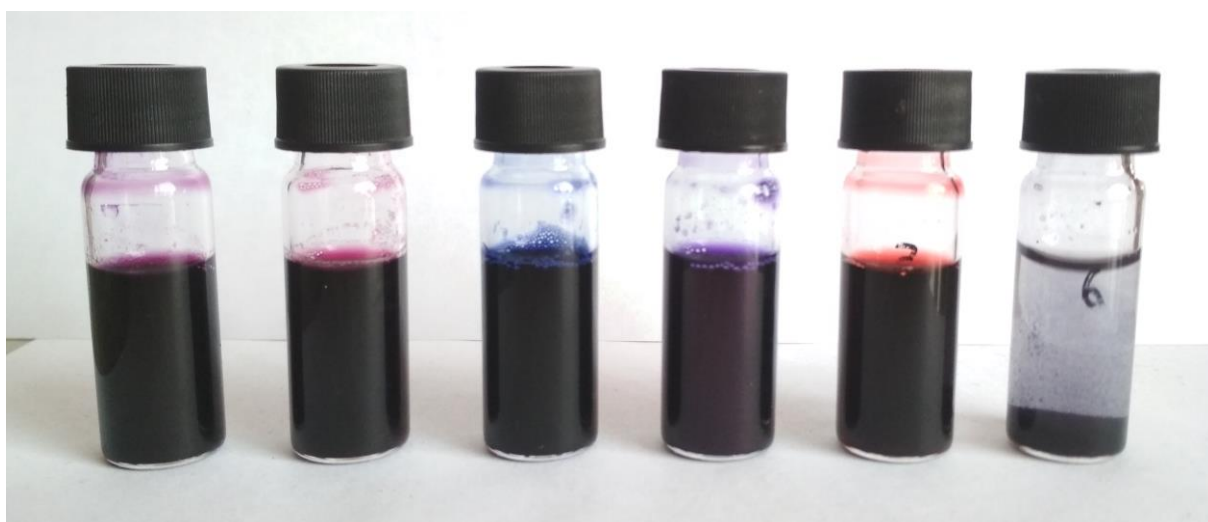

**Color dependence on the ratio of reactants.** Two stock solutions of  $[\text{CpFe}(\text{C}_6\text{H}_6)]\text{BF}_4$  and Aluminon with concentrations 0.005 M were prepared. Then they were mixed in different ratios from 5:1 to 1:5 to form 200  $\mu\text{l}$  solutions in a well plate according to the following scheme:

|   | 1   | 2   | 3     | 4   | 5     | 6   | 7     | 8   | 9     | 10  |
|---|-----|-----|-------|-----|-------|-----|-------|-----|-------|-----|
| A | 1:0 |     | 4.5:1 |     | 3.5:1 |     | 2.5:1 |     | 1.5:1 |     |
| B |     | 5:1 |       | 4:1 |       | 3:1 |       | 2:1 |       | 1:1 |
| C | 0:1 |     | 1:4.5 |     | 1:3.5 |     | 1:2.5 |     | 1:1.5 |     |
| D |     | 1:5 |       | 1:4 |       | 1:3 |       | 1:2 |       |     |

Irradiation time (t) = 0 min:

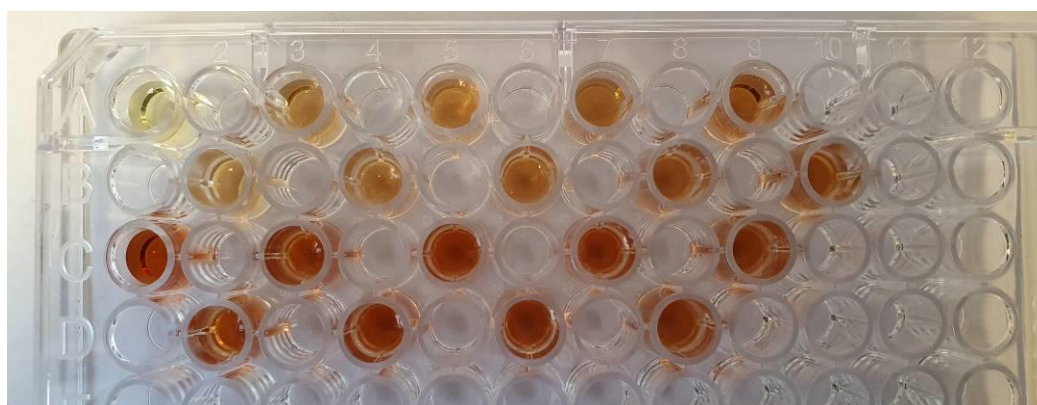

t = 20 min:

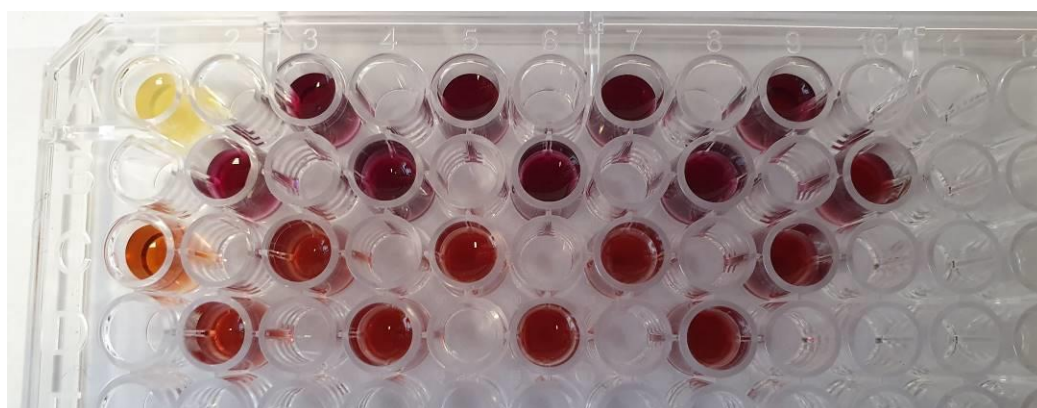

t = 40 min:

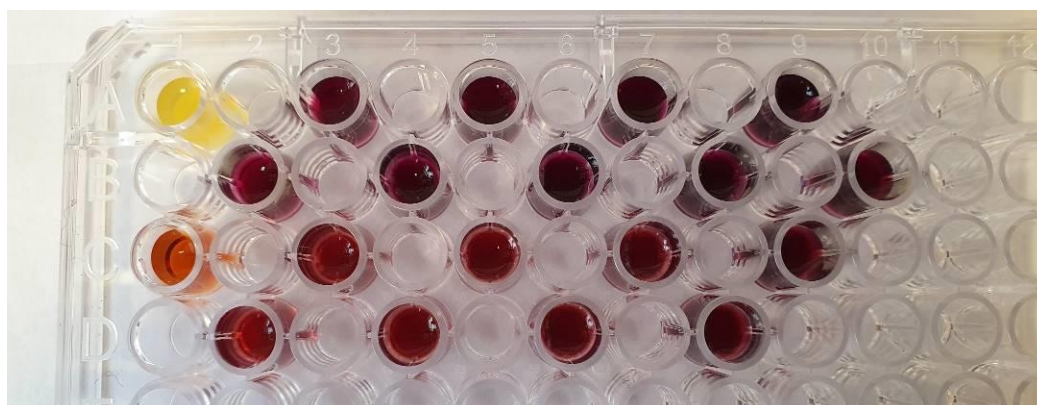

**Color dependence on concentration.** A solution of  $[\text{CpFe}(\text{C}_6\text{H}_6)]\text{BF}_4$  (0.05 M) and Aluminon (0.017 M) was prepared. Then it was diluted in a well plate to produce solutions with concentration of iron from 0.05 to 0.001 M according to the following scheme:

|   | 1      | 2      | 3      | 4       | 5       | 6       |
|---|--------|--------|--------|---------|---------|---------|
| H | 0.05 M | 0.03 M | 0.01 M | 0.005 M | 0.003 M | 0.001 M |

Irradiation time (t) = 0 min:

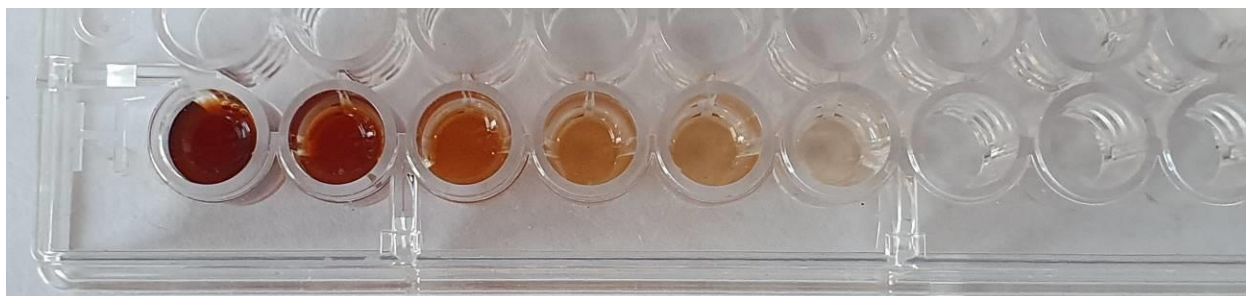

t = 2 min:

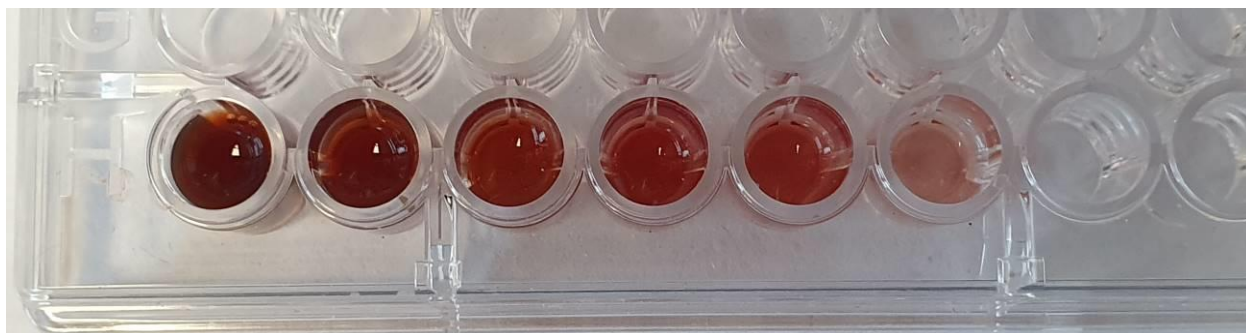

t = 10 min:

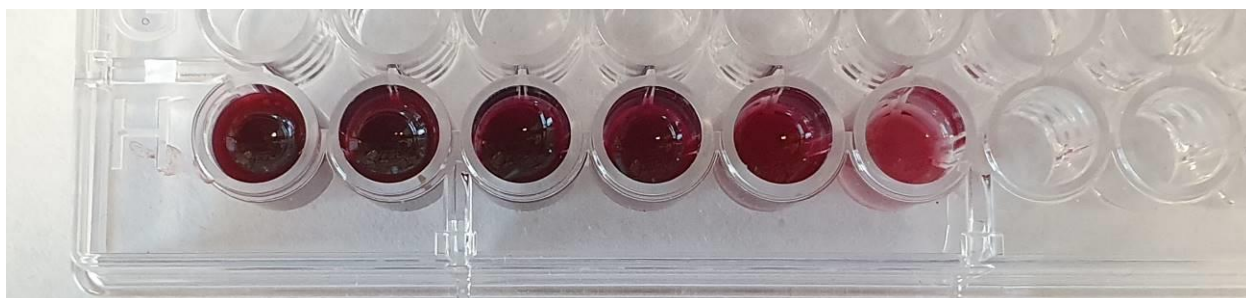

t = 20 min:

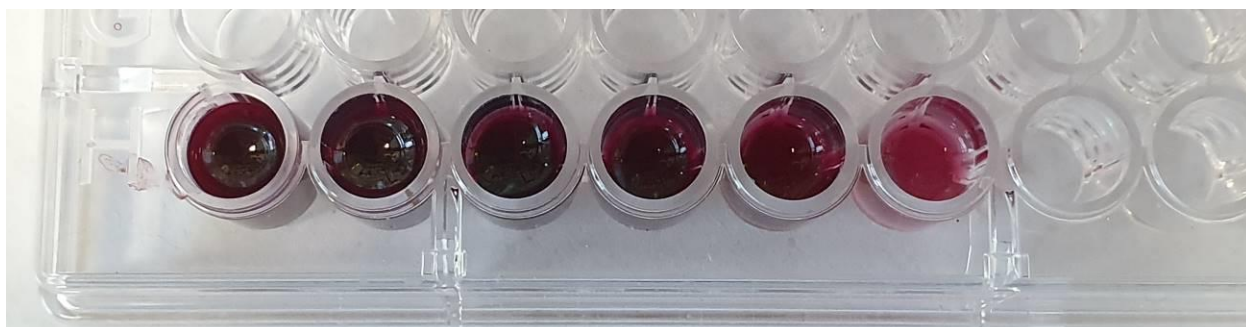

**Photopatterning using different dyes.**  $[\text{CpFe}(\text{C}_6\text{H}_6)]\text{BF}_4$  (0.03 mmol, 8.5 mg) and a dye (0.01 mmol) were dissolved in 3 ml of water (in case of Alizarin Complexone a few drops of  $\text{NH}_3$  solution were added to dissolve the ligand). Then the paper sample was soaked in this solution, dried by heating at 50 °C and irradiated through a stencil for 20 min. The obtained sample was washed with water for 5 min to remove unreacted complex and dye and dried by heating. Chrome Azurol and Eriochrome Cyanine R images can be further improved by careful washing with cold water.

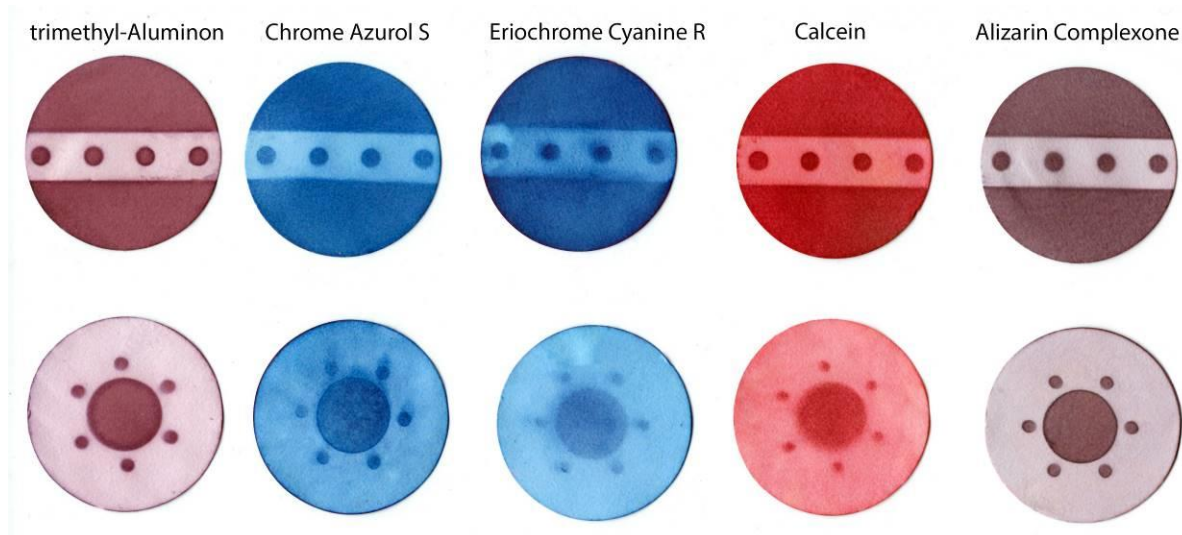

**Microscopy image of the patterned paper sample showing the border between the colored and non-colored areas.**

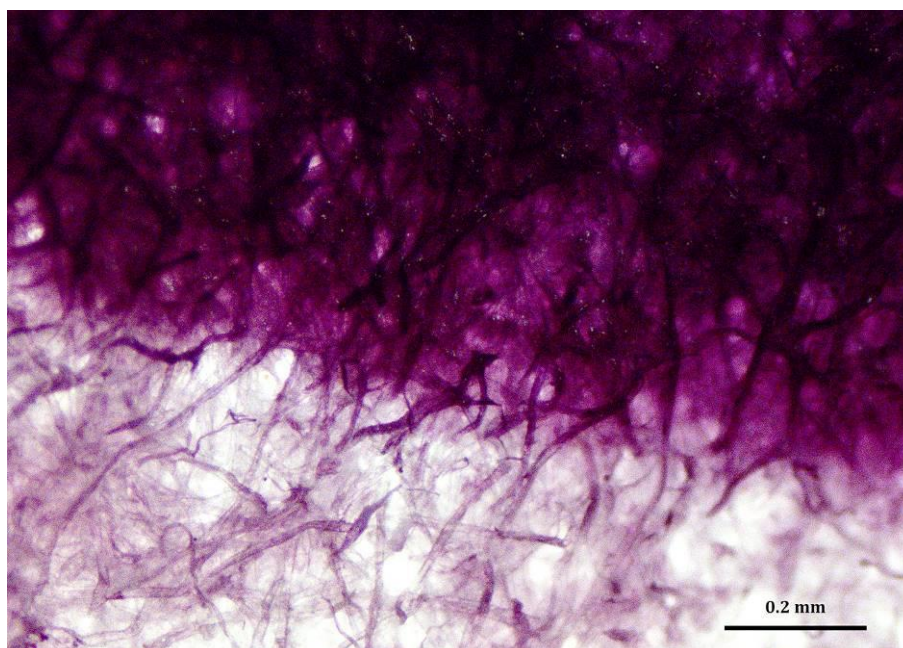

**Reproduction of photo on the cotton fabric by the complex 1 and Aluminon. The photo shows Belka and Strelka, the Soviet dogs that were the first animals to make orbital flight in space.**

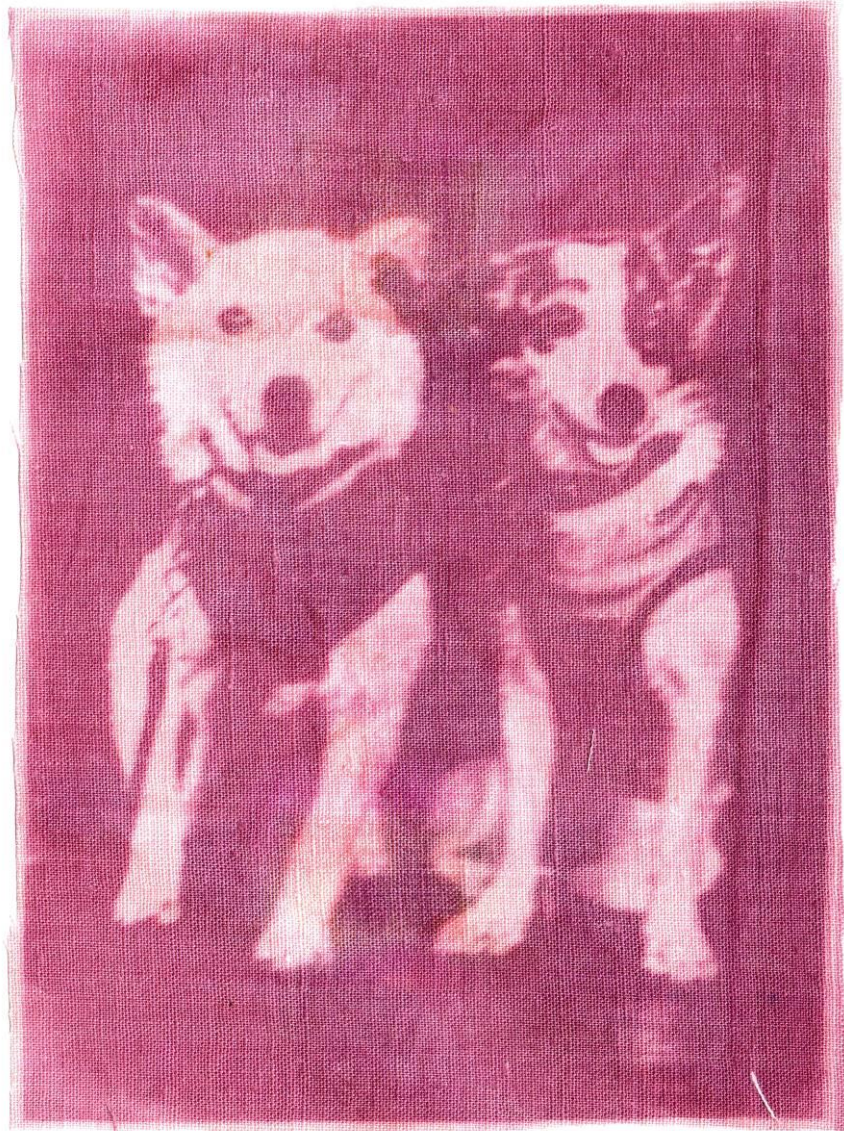

Supplement: d0nj04221h1.pdf [file d0nj04221h1.pdf]
